# Supplementary material for: Delayed Comparison and Apriori Algorithm (DCAA): A Tool for Discovering Protein–Protein Interactions From Time-Series Phosphoproteomic Data
Source: Front Mol Biosci. 2020 Dec 10;7:606570. doi: 10.3389/fmolb.2020.606570 (PMC7758479; doi:10.3389/fmolb.2020.606570)
Supplement: Supplementary file 1 [file Table_1.XLSX]

## Sheet: Sheet1
Table S1. The numbers of inter-class inference rules when using different clustering methods
Full trend clustering				Angle clustering				Pearson clustering
Inter-class inference rules		Actual hit rate	Random hit rate	Inter-class inference rules		Actual hit rate	Random hit rate	Inter-class inference rules		Actual hit rate	Random hit rate
301	436	0.629	0.632	10108	1193	0.875	0.525	11768	1418	0.9	0.68
436	301	0.629	0.637	10108	1492	0.5	0.617	11768	227	0.75	0.575
301	3223	0.667	0.533	10108	1679	0.7	0.74	11768	2396	0.5	0.775
301	567	0.637	0.637	10108	1820	0.5	0.675	11768	2398	0.25	0.6
567	301	0.637	0.625	10108	1862	0.667	0.717	11768	2461	1	0.667
301	34	0.613	0.654	10108	2024	0.75	0.475	11768	2786	0.8	0.53
34	301	0.613	0.612	10108	231	0.719	0.653	11768	289	1	0.5
436	3223	0.727	0.705	10108	2669	0.667	0.65	11768	3437	0.833	0.633
436	567	0.628	0.65	10108	280	0.75	0.625	11768	3514	0.833	0.633
567	436	0.628	0.636	10108	3111	0.75	0.65	11768	4840	1	0.75
436	34	0.62	0.637	10108	3215	0	0.625	11768	4870	1	0.733
34	436	0.62	0.634	10108	3299	0.833	0.592	11768	4878	0.5	0.7
567	3223	0.706	0.576	10108	3414	1	0.75	11768	5099	1	0.525
34	3223	0.711	0.629	10108	359	0.682	0.655	11768	5160	0.75	0.65
567	34	0.641	0.601	10108	378	1	0.583	11768	5424	0.5	0.6
34	567	0.641	0.61	10108	3789	0.667	0.633	11768	590	0.917	0.65
233	1868	0.635	0.614	10108	382	0.75	0.675	11768	6302	0.5	0.425
511	1868	0.511	0.639	10108	4000	0.583	0.525	11768	806	1	0.55
233	1576	0.706	0.634	10108	4071	0.75	0.475	11768	8330	0.5	0.65
233	511	0.567	0.621	10108	4097	0.875	0.713	11768	91	0.833	0.533
511	233	0.567	0.658	10108	4321	0.5	0.65	1418	227	0.7	0.66
511	1576	0.539	0.611	10108	5069	0.75	0.6	1418	2396	0.3	0.61
718	1454	0.718	0.594	10108	6359	0.833	0.567	1418	2398	0.3	0.65
391	1454	0.689	0.66	10108	6399	0.667	0.583	1418	2461	0.867	0.673
718	1633	0.5	0.67	10108	663	0.833	0.517	1418	2786	0.68	0.728
391	1633	0.54	0.659	10108	6931	1	0.525	1418	289	0.7	0.57
718	391	0.658	0.595	10108	729	0.75	0.625	1418	3437	0.933	0.627
391	718	0.658	0.631	10108	7410	0.75	0.6	1418	3514	0.867	0.627
260	1221	0.817	0.657	10108	809	0.833	0.733	1418	4840	0.8	0.55
150	1221	0.778	0.631	10108	874	0.5	0.683	1418	4870	0.933	0.587
260	150	0.833	0.676	10108	935	0.75	0.55	1418	4878	0.4	0.63
150	260	0.833	0.659	10108	9901	0.75	0.725	1418	5099	0.8	0.72
260	1131	0.793	0.583	1193	1492	0.5	0.625	1418	5160	0.6	0.7
150	1131	0.815	0.62	1193	1679	0.95	0.665	1418	5424	0.3	0.63
353	1007	0.625	0.668	1193	1820	0.625	0.671	1418	590	0.7	0.643
722	1007	0.581	0.67	1193	1862	0.75	0.7	1418	6302	0.2	0.74
185	1007	0.634	0.607	1193	2024	0.875	0.5	1418	806	0.4	0.61
353	722	0.59	0.653	1193	231	0.828	0.634	1418	8330	0.6	0.69
722	353	0.59	0.627	1193	2669	1	0.575	1418	91	0.8	0.633
353	185	0.57	0.624	1193	280	0.75	0.538	227	2396	0.75	0.7
185	353	0.57	0.607	1193	3111	0.875	0.625	227	2398	0.5	0.65
722	185	0.619	0.643	1193	3215	0.625	0.713	227	2461	1	0.767
185	722	0.619	0.657	1193	3299	0.792	0.688	227	2786	0.8	0.71
480	1569	0.71	0.664	1193	3414	0.75	0.513	227	289	0.75	0.625
480	2016	0.727	0.62	1193	359	0.682	0.555	227	3437	1	0.533
480	2432	0.778	0.678	1193	378	1	0.642	227	3514	1	0.517
286	1922	0.769	0.698	1193	3789	0.667	0.708	227	4840	1	0.6
595	1922	0.583	0.608	1193	382	0.958	0.583	227	4870	0.833	0.75
658	1922	0.829	0.632	1193	4000	0.708	0.638	227	4878	0.25	0.5
286	595	0.821	0.618	1193	4071	0.875	0.675	227	5099	1	0.6
595	286	0.821	0.672	1193	4097	0.813	0.719	227	5160	0.75	0.6
286	658	0.798	0.67	1193	4321	0.625	0.6	227	5424	0.5	0.7
658	286	0.798	0.608	1193	5069	0.875	0.688	227	590	0.75	0.725
595	658	0.842	0.619	1193	6359	0.667	0.717	227	6302	0.5	0.675
658	595	0.842	0.682	1193	6399	0.917	0.625	227	806	0.25	0.45
44	173	0.621	0.667	1193	663	1	0.708	227	8330	0.5	0.65
173	44	0.621	0.635	1193	6931	0.75	0.575	227	91	0.833	0.667
44	414	0.719	0.686	1193	729	0.875	0.55	2396	2398	0.25	0.525
414	44	0.719	0.644	1193	7410	0.75	0.563	2396	2461	0.5	0.517
44	1586	0.721	0.593	1193	809	0.917	0.633	2396	2786	0.5	0.67
173	414	0.741	0.638	1193	874	0.667	0.717	2396	289	0.5	0.525
414	173	0.741	0.644	1193	935	0.625	0.663	2396	3437	0.5	0.7
173	1586	0.759	0.645	1193	9901	0.75	0.55	2396	3514	0.5	0.7
414	1586	0.786	0.639	1492	1679	0.4	0.613	2396	4840	0.75	0.625
1868	233	0.635	0.648	1492	1820	0.333	0.689	2396	4870	0.833	0.6
1868	1576	0.605	0.683	1492	1862	0.222	0.544	2396	4878	0.25	0.65
1576	1868	0.605	0.597	1492	2024	0.667	0.65	2396	5099	0.75	0.725
1868	511	0.511	0.635	1492	231	0.458	0.644	2396	5160	0.25	0.75
1576	233	0.706	0.633	1492	2669	0.444	0.622	2396	5424	0.5	0.6
1576	511	0.539	0.639	1492	280	0.333	0.65	2396	590	0.417	0.675
1454	1633	0.705	0.572	1492	3111	0.5	0.7	2396	6302	0.25	0.675
1633	1454	0.705	0.644	1492	3215	0.333	0.733	2396	806	0	0.7
1454	718	0.718	0.651	1492	3299	0.556	0.733	2396	8330	0.5	0.6
1454	391	0.689	0.639	1492	3414	0.5	0.75	2396	91	0.5	0.617
1633	718	0.5	0.591	1492	359	0.364	0.579	2398	2461	0.333	0.617
1633	391	0.54	0.633	1492	378	0.667	0.756	2398	2786	0.3	0.72
1221	260	0.817	0.577	1492	3789	0.444	0.756	2398	289	0.25	0.575
1221	150	0.778	0.596	1492	382	0.611	0.617	2398	3437	0.5	0.667
1221	1131	0.789	0.65	1492	4000	0.5	0.611	2398	3514	0.5	0.567
1131	1221	0.789	0.608	1492	4071	0.667	0.65	2398	4840	0.5	0.55
1131	260	0.793	0.629	1492	4097	0.5	0.625	2398	4870	0.5	0.533
1131	150	0.815	0.627	1492	4321	0.5	0.7	2398	4878	0.25	0.55
1007	353	0.625	0.649	1492	5069	0.5	0.7	2398	5099	0.5	0.5
1007	722	0.581	0.637	1492	6359	0.444	0.6	2398	5160	0.25	0.625
1007	185	0.634	0.605	1492	6399	0.556	0.722	2398	5424	0.25	0.775
1569	480	0.71	0.627	1492	663	0.556	0.678	2398	590	0.417	0.625
2016	480	0.727	0.641	1492	6931	0.5	0.6	2398	6302	0	0.775
2432	480	0.778	0.711	1492	729	0.667	0.55	2398	806	0.25	0.675
1569	2016	0.715	0.642	1492	7410	0.5	0.767	2398	8330	0	0.65
2016	1569	0.715	0.634	1492	809	0.222	0.533	2398	91	0.5	0.5
1569	2432	0.556	0.722	1492	874	0.444	0.622	2461	2786	0.667	0.62
2432	1569	0.556	0.667	1492	935	0.333	0.617	2461	289	0.667	0.717
2016	2432	0.75	0.7	1492	9901	0.5	0.6	2461	3437	0.667	0.6
2432	2016	0.75	0.613	1679	1820	0.667	0.643	2461	3514	0.667	0.733
1922	286	0.769	0.602	1679	1862	0.667	0.64	2461	4840	0.833	0.617
1922	595	0.583	0.608	1679	2024	0.8	0.63	2461	4870	0.778	0.622
1922	658	0.829	0.659	1679	231	0.8	0.654	2461	4878	0.5	0.583
1586	44	0.721	0.591	1679	2669	0.733	0.44	2461	5099	1	0.55
1586	173	0.759	0.619	1679	280	0.7	0.63	2461	5160	1	0.633
1586	414	0.786	0.591	1679	3111	0.9	0.62	2461	5424	0.5	0.683
44	173	0.621	0.126	1679	3215	0.5	0.4	2461	590	0.667	0.644
173	1586	0.759	0.092	1679	3299	0.867	0.647	2461	6302	0.333	0.667
173	414	0.741	0.121	1679	3414	0.8	0.62	2461	806	0.667	0.683
1586	44	0.721	0.107	1679	359	0.727	0.529	2461	8330	0.667	0.717
44	414	0.719	0.117	1679	378	0.8	0.593	2461	91	0.667	0.556
1586	414	0.786	0.123	1679	3789	0.733	0.653	2786	289	0.7	0.71
				1679	382	0.8	0.683	2786	3437	0.733	0.7
				1679	4000	0.7	0.697	2786	3514	0.667	0.707
				1679	4071	0.7	0.7	2786	4840	0.8	0.67
				1679	4097	0.75	0.61	2786	4870	0.8	0.567
				1679	4321	0.6	0.54	2786	4878	0.3	0.65
				1679	5069	0.7	0.6	2786	5099	0.9	0.6
				1679	6359	0.8	0.633	2786	5160	0.7	0.59
				1679	6399	0.8	0.673	2786	5424	0.4	0.6
				1679	663	1	0.62	2786	590	0.667	0.63
				1679	6931	0.8	0.57	2786	6302	0.4	0.73
				1679	729	0.8	0.64	2786	806	0.5	0.6
				1679	7410	0.7	0.66	2786	8330	0.7	0.68
				1679	809	0.867	0.607	2786	91	0.733	0.687
				1679	874	0.733	0.653	289	3437	0.833	0.683
				1679	935	0.8	0.67	289	3514	0.833	0.617
				1679	9901	0.4	0.65	289	4840	0.75	0.625
				1820	1862	0.556	0.656	289	4870	0.833	0.667
				1820	2024	0.667	0.6	289	4878	0.25	0.675
				1820	231	0.656	0.683	289	5099	1	0.625
				1820	2669	0.667	0.617	289	5160	0.5	0.65
				1820	280	0.417	0.567	289	5424	0.5	0.425
				1820	3111	0.667	0.717	289	590	0.667	0.675
				1820	3215	0.583	0.667	289	6302	0.25	0.75
				1820	3299	0.75	0.653	289	806	0.5	0.675
				1820	3414	0.583	0.625	289	8330	0.5	0.725
				1820	359	0.545	0.608	289	91	0.833	0.683
				1820	378	0.667	0.639	3437	3514	0.889	0.678
				1820	3789	0.5	0.644	3437	4840	0.833	0.717
				1820	382	0.667	0.664	3437	4870	0.889	0.689
				1820	4000	0.528	0.583	3437	4878	0.5	0.683
				1820	4071	0.75	0.625	3437	5099	1	0.583
				1820	4097	0.667	0.638	3437	5160	1	0.617
				1820	4321	0.417	0.75	3437	5424	0.5	0.6
				1820	5069	0.667	0.725	3437	590	0.778	0.711
				1820	6359	0.722	0.6	3437	6302	0.333	0.683
				1820	6399	0.611	0.578	3437	806	0.833	0.75
				1820	663	0.667	0.644	3437	8330	1	0.617
				1820	6931	0.5	0.6	3437	91	0.778	0.533
				1820	729	0.75	0.617	3514	4840	1	0.55
				1820	7410	0.667	0.6	3514	4870	0.889	0.544
				1820	809	0.5	0.594	3514	4878	0.5	0.5
				1820	874	0.556	0.617	3514	5099	1	0.6
				1820	935	0.5	0.692	3514	5160	0.833	0.667
				1820	9901	0.25	0.567	3514	5424	0.5	0.633
				1862	2024	1	0.617	3514	590	0.833	0.6
				1862	231	0.729	0.633	3514	6302	0.333	0.683
				1862	2669	0.667	0.678	3514	806	0.333	0.633
				1862	280	0.333	0.683	3514	8330	0.667	0.717
				1862	3111	0.667	0.483	3514	91	0.778	0.522
				1862	3215	0.333	0.55	4840	4870	0.833	0.717
				1862	3299	0.778	0.6	4840	4878	0.25	0.75
				1862	3414	0.5	0.617	4840	5099	0.75	0.525
				1862	359	0.697	0.53	4840	5160	1	0.45
				1862	378	0.778	0.589	4840	5424	0.25	0.5
				1862	3789	0.556	0.689	4840	590	0.833	0.683
				1862	382	0.833	0.606	4840	6302	0.75	0.5
				1862	4000	0.778	0.611	4840	806	0.75	0.55
				1862	4071	0.833	0.567	4840	8330	1	0.7
				1862	4097	0.667	0.533	4840	91	0.667	0.717
				1862	4321	0.333	0.683	4870	4878	0.333	0.583
				1862	5069	0.667	0.667	4870	5099	1	0.733
				1862	6359	0.667	0.644	4870	5160	1	0.65
				1862	6399	0.778	0.644	4870	5424	0.333	0.55
				1862	663	0.667	0.556	4870	590	0.889	0.722
				1862	6931	0.5	0.767	4870	6302	0.667	0.6
				1862	729	0.833	0.517	4870	806	1	0.683
				1862	7410	0.833	0.65	4870	8330	1	0.533
				1862	809	0.778	0.656	4870	91	0.778	0.656
				1862	874	0.444	0.667	4878	5099	0.5	0.675
				1862	935	0.333	0.567	4878	5160	0.5	0.45
				1862	9901	0.5	0.617	4878	5424	0	0.675
				2024	231	0.625	0.634	4878	590	0.417	0.775
				2024	2669	0.5	0.6	4878	6302	0.5	0.625
				2024	280	1	0.825	4878	806	0.25	0.45
				2024	3111	0.75	0.725	4878	8330	0.5	0.55
				2024	3215	0	0.65	4878	91	0.5	0.617
				2024	3299	0.583	0.608	5099	5160	0.5	0.675
				2024	3414	1	0.55	5099	5424	0.25	0.575
				2024	359	0.682	0.691	5099	590	1	0.683
				2024	378	1	0.583	5099	6302	0.5	0.7
				2024	3789	0.667	0.6	5099	806	0.75	0.7
				2024	382	0.583	0.608	5099	8330	1	0.65
				2024	4000	0.417	0.625	5099	91	0.833	0.75
				2024	4071	0.75	0.675	5160	5424	0.5	0.675
				2024	4097	0.75	0.663	5160	590	0.667	0.717
				2024	4321	0.5	0.6	5160	6302	0	0.675
				2024	5069	0.75	0.45	5160	806	0.25	0.9
				2024	6359	0.5	0.55	5160	8330	0.5	0.65
				2024	6399	0.667	0.55	5160	91	0.667	0.6
				2024	663	1	0.733	5424	590	0.417	0.717
				2024	6931	0.75	0.65	5424	6302	0.5	0.625
				2024	729	0.75	0.85	5424	806	0.5	0.6
				2024	7410	0.5	0.575	5424	8330	0.5	0.575
				2024	809	0.833	0.55	5424	91	0.333	0.583
				2024	874	0.667	0.683	590	6302	0.417	0.725
				2024	935	1	0.725	590	806	0.417	0.575
				2024	9901	0.75	0.775	590	8330	0.667	0.65
				231	2669	0.708	0.608	590	91	0.778	0.572
				231	280	0.688	0.656	6302	806	0.25	0.675
				231	3111	0.781	0.569	6302	8330	0.25	0.425
				231	3215	0.438	0.666	6302	91	0.5	0.633
				231	3299	0.75	0.67	806	8330	0.25	0.625
				231	3414	0.688	0.731	806	91	0.833	0.567
				231	359	0.693	0.652	8330	91	0.833	0.667
				231	378	0.917	0.602
				231	3789	0.708	0.573
				231	382	0.792	0.592
				231	4000	0.625	0.649
				231	4071	0.781	0.525
				231	4097	0.781	0.641
				231	4321	0.625	0.663
				231	5069	0.813	0.638
				231	6359	0.708	0.546
				231	6399	0.792	0.644
				231	663	0.833	0.627
				231	6931	0.781	0.663
				231	729	0.75	0.647
				231	7410	0.781	0.625
				231	809	0.813	0.54
				231	874	0.708	0.592
				231	935	0.75	0.569
				231	9901	0.625	0.531
				2669	280	1	0.55
				2669	3111	0.667	0.617
				2669	3215	0.333	0.583
				2669	3299	0.722	0.661
				2669	3414	0.667	0.717
				2669	359	0.545	0.558
				2669	378	0.667	0.644
				2669	3789	0.778	0.656
				2669	382	0.778	0.572
				2669	4000	0.556	0.611
				2669	4071	0.667	0.517
				2669	4097	0.667	0.483
				2669	4321	0.667	0.583
				2669	5069	0.833	0.6
				2669	6359	0.667	0.722
				2669	6399	0.667	0.567
				2669	663	1	0.533
				2669	6931	1	0.717
				2669	729	0.833	0.717
				2669	7410	0.667	0.65
				2669	809	0.889	0.467
				2669	874	0.778	0.789
				2669	935	0.833	0.617
				2669	9901	0.667	0.65
				280	3111	0.5	0.675
				280	3215	0.75	0.6
				280	3299	0.833	0.608
				280	3414	0.25	0.575
				280	359	0.545	0.768
				280	378	1	0.6
				280	3789	0.5	0.633
				280	382	1	0.683
				280	4000	0.75	0.625
				280	4071	1	0.75
				280	4097	0.875	0.575
				280	4321	0.5	0.575
				280	5069	0.75	0.75
				280	6359	0.833	0.617
				280	6399	0.833	0.583
				280	663	0.667	0.7
				280	6931	0.75	0.65
				280	729	1	0.6
				280	7410	1	0.625
				280	809	0.5	0.717
				280	874	0.5	0.633
				280	935	0.5	0.675
				280	9901	0.75	0.525
				3111	3215	0.5	0.675
				3111	3299	0.833	0.55
				3111	3414	0.5	0.575
				3111	359	0.727	0.645
				3111	378	0.667	0.683
				3111	3789	0.667	0.65
				3111	382	1	0.633
				3111	4000	0.75	0.617
				3111	4071	1	0.575
				3111	4097	0.75	0.65
				3111	4321	0.5	0.6
				3111	5069	0.75	0.725
				3111	6359	0.667	0.6
				3111	6399	0.667	0.6
				3111	663	0.5	0.767
				3111	6931	0.75	0.625
				3111	729	0.75	0.675
				3111	7410	0.5	0.65
				3111	809	0.833	0.583
				3111	874	0.5	0.767
				3111	935	0.25	0.8
				3111	9901	0.75	0.7
				3215	3299	0	0.542
				3215	3414	0.5	0.675
				3215	359	0.455	0.632
				3215	378	0.333	0.683
				3215	3789	0.167	0.633
				3215	382	0.583	0.733
				3215	4000	0.167	0.708
				3215	4071	0.5	0.525
				3215	4097	0.125	0.563
				3215	4321	0.25	0.625
				3215	5069	0.5	0.65
				3215	6359	0.5	0.533
				3215	6399	0.333	0.75
				3215	663	0.667	0.683
				3215	6931	0	0.6
				3215	729	0	0.625
				3215	7410	0.25	0.75
				3215	809	0.167	0.583
				3215	874	0.333	0.683
				3215	935	0.25	0.575
				3215	9901	0.25	0.725
				3299	3414	0.667	0.617
				3299	359	0.652	0.556
				3299	378	1	0.661
				3299	3789	0.611	0.65
				3299	382	0.778	0.597
				3299	4000	0.611	0.669
				3299	4071	0.667	0.567
				3299	4097	0.75	0.579
				3299	4321	0.583	0.65
				3299	5069	0.917	0.592
				3299	6359	0.556	0.633
				3299	6399	0.778	0.761
				3299	663	0.778	0.522
				3299	6931	0.75	0.6
				3299	729	0.5	0.633
				3299	7410	0.667	0.642
				3299	809	0.778	0.672
				3299	874	0.556	0.633
				3299	935	0.667	0.542
				3299	9901	0.833	0.55
				3414	359	0.636	0.677
				3414	378	0.667	0.683
				3414	3789	0.833	0.633
				3414	382	0.917	0.683
				3414	4000	0.667	0.617
				3414	4071	1	0.525
				3414	4097	0.75	0.663
				3414	4321	0.5	0.65
				3414	5069	0.75	0.45
				3414	6359	0.5	0.617
				3414	6399	0.5	0.533
				3414	663	0.5	0.617
				3414	6931	0.75	0.575
				3414	729	0.75	0.625
				3414	7410	0.5	0.55
				3414	809	0.833	0.633
				3414	874	0.5	0.683
				3414	935	0.25	0.5
				3414	9901	0.5	0.6
				359	378	0.818	0.609
				359	3789	0.667	0.691
				359	382	0.833	0.638
				359	4000	0.606	0.624
				359	4071	0.773	0.609
				359	4097	0.682	0.639
				359	4321	0.455	0.745
				359	5069	0.818	0.65
				359	6359	0.636	0.652
				359	6399	0.758	0.667
				359	663	0.697	0.612
				359	6931	0.636	0.668
				359	729	0.682	0.709
				359	7410	0.591	0.586
				359	809	0.636	0.63
				359	874	0.606	0.685
				359	935	0.591	0.682
				359	9901	0.364	0.65
				378	3789	1	0.6
				378	382	0.889	0.633
				378	4000	0.722	0.639
				378	4071	0.833	0.733
				378	4097	0.833	0.6
				378	4321	0.667	0.7
				378	5069	0.5	0.65
				378	6359	1	0.533
				378	6399	0.778	0.678
				378	663	1	0.6
				378	6931	1	0.683
				378	729	1	0.717
				378	7410	1	0.633
				378	809	0.778	0.689
				378	874	1	0.567
				378	935	0.667	0.567
				378	9901	0.5	0.533
				3789	382	0.778	0.7
				3789	4000	0.667	0.65
				3789	4071	0.667	0.717
				3789	4097	0.5	0.658
				3789	4321	0.667	0.55
				3789	5069	0.833	0.683
				3789	6359	0.889	0.578
				3789	6399	0.667	0.611
				3789	663	0.889	0.622
				3789	6931	0.333	0.683
				3789	729	0.833	0.517
				3789	7410	0.5	0.6
				3789	809	0.667	0.544
				3789	874	0.556	0.6
				3789	935	0.667	0.75
				3789	9901	0.833	0.517
				382	4000	0.583	0.639
				382	4071	0.75	0.683
				382	4097	0.833	0.679
				382	4321	0.833	0.633
				382	5069	0.75	0.583
				382	6359	0.667	0.672
				382	6399	0.778	0.633
				382	663	0.944	0.622
				382	6931	1	0.7
				382	729	0.833	0.592
				382	7410	0.667	0.517
				382	809	0.944	0.689
				382	874	0.833	0.694
				382	935	1	0.625
				382	9901	0.75	0.717
				4000	4071	0.583	0.708
				4000	4097	0.667	0.667
				4000	4321	0.667	0.658
				4000	5069	0.583	0.592
				4000	6359	0.5	0.606
				4000	6399	0.611	0.628
				4000	663	0.722	0.722
				4000	6931	0.75	0.65
				4000	729	0.667	0.692
				4000	7410	0.417	0.558
				4000	809	0.833	0.633
				4000	874	0.667	0.617
				4000	935	0.667	0.7
				4000	9901	0.583	0.608
				4071	4097	0.75	0.663
				4071	4321	1	0.6
				4071	5069	0.75	0.55
				4071	6359	0.667	0.55
				4071	6399	0.667	0.65
				4071	663	0.833	0.683
				4071	6931	0.75	0.55
				4071	729	1	0.6
				4071	7410	0.75	0.675
				4071	809	1	0.667
				4071	874	0.667	0.567
				4071	935	1	0.625
				4071	9901	0.75	0.475
				4097	4321	0.625	0.563
				4097	5069	0.875	0.725
				4097	6359	0.667	0.592
				4097	6399	0.75	0.6
				4097	663	0.75	0.6
				4097	6931	0.5	0.538
				4097	729	0.5	0.625
				4097	7410	0.75	0.675
				4097	809	0.833	0.642
				4097	874	0.583	0.658
				4097	935	0.625	0.5
				4097	9901	0.625	0.55
				4321	5069	1	0.625
				4321	6359	0.667	0.633
				4321	6399	0.5	0.55
				4321	663	0.667	0.6
				4321	6931	0.75	0.55
				4321	729	0.5	0.7
				4321	7410	0.75	0.475
				4321	809	0.667	0.567
				4321	874	0.333	0.667
				4321	935	0.75	0.65
				4321	9901	0.5	0.4
				5069	6359	1	0.55
				5069	6399	0.833	0.517
				5069	663	1	0.8
				5069	6931	0.75	0.65
				5069	729	1	0.575
				5069	7410	0.75	0.725
				5069	809	0.833	0.7
				5069	874	0.667	0.667
				5069	935	1	0.675
				5069	9901	0.5	0.675
				6359	6399	0.778	0.778
				6359	663	0.778	0.678
				6359	6931	0.833	0.6
				6359	729	0.5	0.55
				6359	7410	0.5	0.467
				6359	809	0.778	0.733
				6359	874	0.667	0.556
				6359	935	0.667	0.55
				6359	9901	0.833	0.75
				6399	663	0.778	0.689
				6399	6931	0.833	0.6
				6399	729	0.833	0.617
				6399	7410	0.667	0.783
				6399	809	0.667	0.656
				6399	874	0.667	0.8
				6399	935	0.667	0.7
				6399	9901	0.5	0.717
				663	6931	0.833	0.533
				663	729	0.667	0.7
				663	7410	0.667	0.65
				663	809	1	0.689
				663	874	0.778	0.589
				663	935	0.667	0.533
				663	9901	0.833	0.5
				6931	729	0.75	0.65
				6931	7410	0.75	0.55
				6931	809	0.667	0.65
				6931	874	0.5	0.65
				6931	935	0.5	0.575
				6931	9901	1	0.675
				729	7410	0.75	0.5
				729	809	0.667	0.7
				729	874	0.667	0.65
				729	935	0.75	0.5
				729	9901	1	0.7
				7410	809	0.667	0.567
				7410	874	0.833	0.483
				7410	935	0.75	0.575
				7410	9901	0.75	0.725
				809	874	0.444	0.711
				809	935	0.667	0.717
				809	9901	0.5	0.7
				874	935	0.833	0.6
				874	9901	0.5	0.6
				935	9901	0.25	0.675
