# Supplementary material for: Delayed Comparison and Apriori Algorithm (DCAA): A Tool for Discovering Protein–Protein Interactions From Time-Series Phosphoproteomic Data
Source: Front Mol Biosci. 2020 Dec 10;7:606570. doi: 10.3389/fmolb.2020.606570 (PMC7758479; doi:10.3389/fmolb.2020.606570)
Supplement: Supplementary file 2 [file Table_2.DOCX]

**Appendix 1**

Algorithm: Pseudocode of Apriori algorithm
